# Supplementary material
Source: PubMed Central journal article supplement (PMC3670375)
Supplement: 1303884110_pnas.201303884SI.pdf [file 1303884110_pnas.201303884SI.pdf]

# Supporting Information

Mao et al. 10.1073/pnas.1303884110

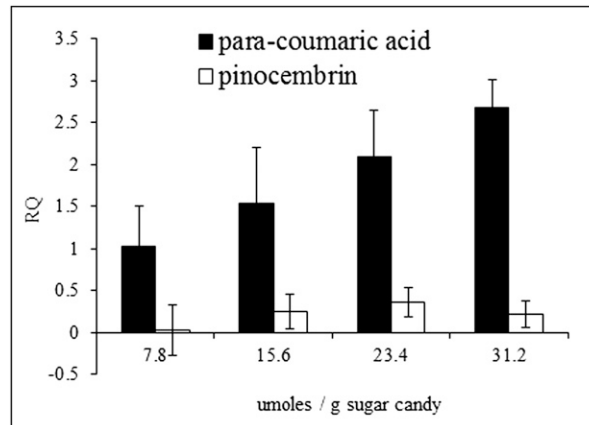

Fig. S1. Assays to determine dose–response range for quantitative RT-PCR analysis of CYP9Q3 up-regulation by putative inducers *p*-coumaric acid and pinocembrin.

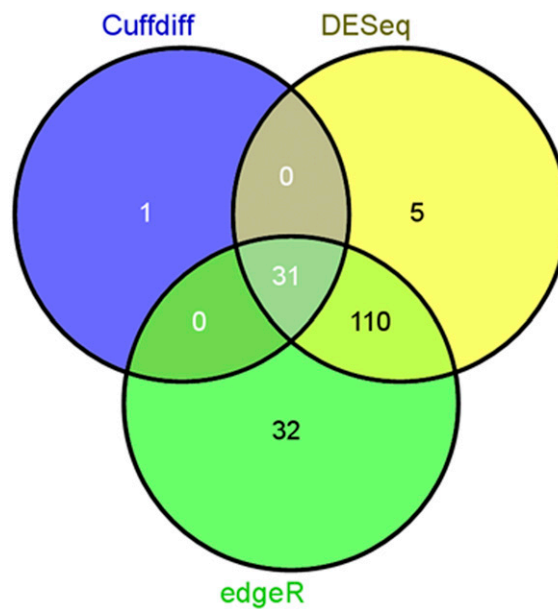

Fig. S2. Depiction of intersecting sets of genes up-regulated by *p*-coumaric acid as determined by massively parallel sequencing of RNA (RNA-seq) of genes and identified by three analytical methods.

**Dataset S1.** Cuffdiff analysis of differential gene expression in the midguts of honey bees fed with *p*-coumaric acid-containing sugar candy (i.e., CoA) vs. “bee candy”

[Dataset S1 \(XLSX\)](#)

CK, bee candy.

**Dataset S2.** DESeq analysis of differential gene expression in the midguts of honey bees fed with *p*-coumaric acid-containing sugar candy (i.e., CoA) vs. bee candy

[Dataset S2 \(XLSX\)](#)

**Dataset S3.** edgeR analysis of differential gene expression in the midguts of honey bees fed with *p*-coumaric acid-containing sugar candy (i.e., CoA) vs. bee candy

[Dataset S3 \(XLSX\)](#)
